# Supplementary material for: Vegetation changes and climate shift during the latest Ladinian to the early Carnian: Palynological evidence from the Yanchang Formation, Ordos Basin, China
Source: Frontiers journal article supplement (doi:10.3389/feart.2022.1008707), 2023-02-01
Supplement: Data_Sheet_1.xlsx [file Data_Sheet_1.xlsx]

## Sheet: Sheet1
Supplementary Appendix S1 Results of the quantitative spore-pollen analysis (specimens)
Species	Samples
	STYM-99	STYM-97	STYM-94	STYM-90	STYM-88	STYM-82	STYM-80	STYM-76	STYM-74	STYM-73	STYM-72	STYM-70	STYM-48	STYM-47	STYM-46	STYM-45	STYM-35	STYM-34	STYM-33	STYM-32	STYM-30	STYM-28	STYM-27	STYM-26	STYM-21	STYM-16	STYM-12	STYM-04	STYM-03	STYM-01
Cyathidites minor Couper, 1953		1	1		2
Calamospora padata Kosanke, 1950																						1	3
Calamospora nathorstii (Halle) Klaus, 1960																						2		3
Calamospora sp.																			2	2		5	3	1	2		2			1
Punctatisporites crassexinis Madler, 1964																											1
Dictyophyllidites harrisii Couper, 1958	8	3		3	2	5							2
Granulatisporites sp.																												7
Cyclogranisporites multigranus Smith et Butterworth, 1967																							7	5	2
Cyclogranisporites callosus Du, 1985																											1
Cyclogranisporites sp.	3	8	2	8	3	5	2	2														2		3	6	11	3	7	5	1
Converrucosisporites saskatchewanensis Pocock, 1962																						1					3
Converrucosisporites decoratus Shang, 2011													2															6
Converrucosisporites sp.											3	2							2
Verrucosisporites scitulus Yu et Zhang, 1982																								6			4			4
Verrucosisporites remyanus Mädler, 1964																						2
Verrucosisporites Krempii Madler, 1964		2			2	2																	7	6			4			1
Verrucosisporites mimicus Qu et Wang, 1986																							1
Verrucosisporites rotundus Singh, 1964																										2			1
Verrucosisporites asymmetricus (Cookson et Dettmann) Pocock, 1962																											1
Verrucosisporites morulae Klaus, 1960																											1
Verrucosisporites congestus Playford, 1963																											1
Verrucosisporites granatus (Bolkh.) Gao et Zhao, 1976																									2
Verrucosisporites sp.	11	5	1	2	2	3		3		2	2	3			2	3	2					2	1	1		2				6
Lophotriletes sp.																					2
Lunzisporites lunzensis Bharadwaj et Singh, 1964																													2	1
Lunzisporites sparsus Bharadwaj et Singh, 1964			1	2	2	5																					3
Apiculatisporites bulliensis Helby et De Jersey, 1979			1
Apiculatisporis pilosus Wu et Zhang, 1983																											1
Apiculatisporis lentus Playford, 1982																						2
Baculatisporites versiformis Qu, 1984																									2
Duplexisporites rotundatus Shugaevsk, 1973		6		5	8	5																4						6	2	1
Duplexisporites sp.	12	1	2																			2	2	2			5
Asseretospora curvata Qu et Wang, 1980			1																			1
Asseretospora gyrata (Playford et Dettmann) Schuurman, 1977																						3				2			1
Asseretospora sp.																						1			2
Kraeuselisporites apiculatus Jansonius, 1962																							2	1					5	3
Kraeuselisporites spinosus Jansonius, 1962	5			2	5	3																				2	2
Kraeuselisporites sp.		3																										8		4
Lundbladispora playfordi Balme, 1963	3	1	3	6	2	2							2									2	1	1	6	3	2		2	5
Lundbladispora sinica Ouyang et Li, 1980																												5		1
Lundbladispora microreticuIata Qu, 1982																														1
Lundbladispora watangensis Qu, 1984																							1	1	2		5	2	7	2
Lundbladispora nejpurgii Schulz, 1964																														2
Lundbladispora subornata Ouyang et Li, 1980													2																	4
Lundbladispora communis Ouyang et Li, 1980		1	5	3	5	3															3		1		2
Lundbladispora willmotti Balme, 1963																							1		2
Lundbladispora minuta Qu, 1984																							1
Lundbladispora sp	5	2	5	2	5	8	5	2	3				5		3		5			2	9	4	3	6	2	3	1	3	9	7
Laevigatosporites sp.																							1
Thymospora sp.																											1
Aratrisporites paenulatus Playford et Dettmann, 1965																						1							1
Aratrisporites granulates (Klaus) Playford et Dettmann, 1965																							4	3	3					1
Aratrisporites coryliseminis Klaus, 1960																							1							1
Aratrisporites tenuispinosus Playford, 1965																							1	3				6	2	1
Aratrisporites exiguus Qu, 1984																						2
Aratrisporites strigosus Playford, 1965																						4	1
Arareisporites scabratus Klaus, 1960																						4
Aratrisporites xiangxiensis Li et Shang, 1980																2
Aratrisporites sp.	3	1	1	5	3	2		2							2	5	2	2	2	2	2	2	1	2	3	2	7			3
Total specimens of spores	50	34	23	38	41	43	7	9	3	2	5	5	13	0	7	10	9	2	6	6	16	47	43	44	36	27	48	50	37	50
Plicatipollenites indicus Lele, 1964										2																			3	1
Accinctisporites sp.										2
Distriomonosaccites sp.										2													1							1
Florinites sp. (recycling pollen)											2				2					3
Protohaploxypinus samoilovichii (Jansonius)Hart, 1964													2
Protohaploxypinus sp.								2				2												1				6	3	2
Striatoabieites bricki Sedova, 1986					2																		2						7	2
Striatoabieites duivenii (Jansonius) Hart, 1964																						1			2	2				1
Striatoabieites sp.	2			2	2	2																	5	7	2		8
Striatopodocarpites sp.				2																		1			2
Lueckisporites triassicus Clarke, 1965																												1
Taeniaesporites junior (Klaus,1960) Wu, 1982					2	3																	1	6
Taeniaesporites combinatus Qu et Wang, 1990																											4	5	7	10
Taeniaesporites leptocorpus Qu, 1984	2	1																					2		2	2
Taeniaesporites divisus Qu, 1982																						1						5
Taeniaesporites watangensis Qu, 1984																						1	1	2					2
Taeniaesporites albertae Jansonius,1962																						1		1			6
Taeniaesporites sp.		1						2						2	2		2						3	2	2	9	2	4	8	9
Caytonipollenites cregii (Pocock) Qu, 1984	2	1		3																										2
Alisporites aequalis Mädler, 1964				3	2	5	2						5										1		6	6			6	2
Alisporites nuthallensis Clarke, 1965		1		2																				4						1
Alisporites parvus De Jersey, 1962		1			3	2			2													1	4					3
Alisporites bilateralis Rouse, 1959																						3		1	5
Alisporites rotundus Rouse, 1959																					2
Alisporites circulicorpus Clarke, 1965		2							2														1	3
Alisporites sp.	9	3	2	5	6	2			2	2							2				2	1		1	5		9	4
Klausipollenites decipiens Jansonius, 1962																													6	2
Klausipollenites schaubergeri (Potonie et Klaus)Jansonius, 1962	3	1		5	2																	8	1		2
Klausipollenites sp.	5	1	4	2	5	9								2		2	2			2			1		3	6	2	3
Sulcatisporites sp.												2
Pinuspollenites sp.		2			2	6
Pityosporites sp.																							2					3	2	1
Protopinus subluteus Bolkh., 1956																									2		2
Protopinus sp.	8	11	10	9	12	5	3													2			1	6	11	9
Pseudopinus sp.																	2						1			2
Piceaepollenites omoriciformis (Bolkh.) Xu et Zhang, 1980		3				3
Piceaepollenites sp.													2										3	5		5	1	2	5	4
Piceites sp.																										2
Protopicea sp.																							5	2			5		4	2
Pseudopicea sp.	6	1	1	2
Cedripites sp.						2							5									1	3			2	1	3	1	1
Platysaccus luteus (Bolkh.) Li et Shang, 1980				2	2	2																		3			3
Platysaccus queenslundi De Jersey, 1962	3	1	2	3									2										2		2			1	2	1
Platysaccus proximus (Bolkh.) Song, 2000	2	1	2	2	5																	3	2	3	2	2
Platysaccus sp.																										2	2		3	3
Podocarpidites multicinus (Bolkh.) Pocock, 1970																					2		1		5
Podocarpidites ornatus Pocock, 1962		1	1
Podocarpidites paulus (Bolkh.) Xu et Zhang, 1980																							1	2		2		1
Podocarpidites transverses Qu et Wang, 1986																									2		1
Podocarpidites unicus (Bolkh.) Pocock, 1970				8	2	3																		1		2
Podocarpidites sp.		2	1	2																		2	6	5			1
Pristinuspollenites sp.	9	7	14	11	8							2	2									4	1			2		1		1
Quadraeculina sp.																									2		1
Paleoconiferae sp.	9	2	3	3	3								2								2	25	8	2	9	14
Protoconiferus sp.								2	2				2		2										2	2
Pseudowalchia crocea Bolkhovitina, 1956																									2
Pseudowalchia sp.	3	5	4	2	5															2		7	5	1		2	2
Ovalipollis minimus Scheuring, 1970	2	1																									1		3	1
Ovalipollis ovalis Krutzsch, 1955	5	1	1	2	3																		1	2	5			2		2
Ovalipollis breviformis Krutzsch, 1955																							2		2			1	3	1
Ovalipollis grebeae Klaus, 1960																						1
Ovalipollis sp.	11	8	14	12	2	5	12	2					3		3		2					7	2	6			3			2
Psophosphaera cognatus (Bolkhovitina) Sung et Lee, 1976																									2
Psophosphaera sp.																										5				1
Araucariacites australis Cookson, 1947																									2
Duplicisporites granulatus Leschik, 1955			1
Chasmatosporites apertus (Rogalska) Nilsson, 1958																											3
Chasmatosporites sp.			5	11	12	5	6		14		2		8				5				5	10	7	5	8	21	6	6	8	5
Ginkgocycadophytus sp.		1	3	3	2	3	5		3		2		9									1
Cycadopites adjectus (De Jersey) De Jersey, 1964																							1
Cycadopites typicus (Maljavkina) Pocock, 1970	3	1	2	3	5	2							5										1	1		2	2
Cycadopites tivoliensis De Jersey, 1971	2	1																				1
Cycadopites reticulata (Nilsson) Arjang, 1975			3	2																		1		1
Cycadopites sp.	2	1			5	3		2					2		6		2				2			1		2	1
Perinopollenites elatoides Couper, 1958	2			5	8	6							2										1
Perinopollenites sp.		1														2							1	1			1	2
Classopollis sp.			1													2	2
Discisporites granulus Zhang, 1984	6	3	5	5	3		2		8				3
Discisporites sp.	3		15	5			3	6	2			2	6	3		2	2
Total specimens of pollen	99	66	94	116	103	68	33	16	35	8	4	8	60	7	13	8	21	0	0	6	15	81	80	75	89	103	67	53	73	58
SUM	149	100	117	154	144	111	40	25	38	10	9	13	73	7	20	18	30	2	6	12	31	128	123	119	125	130	115	103	110	108
